# Supplementary material for: Absence of PEXEL-Dependent Protein Export in Plasmodium Liver Stages Cannot Be Restored by Gain of the HSP101 Protein Translocon ATPase
Source: PubMed Central journal article supplement (PMC8693896; doi:10.3389/fgene.2021.742153), 2021-12-08
Supplement: DataSheet1.pdf [file DataSheet1.pdf]

*Supplementary Material*

**Absence of PEXEL-dependent protein export in *Plasmodium* liver stages cannot be restored by gain of the HSP101 protein translocon ATPase**

Oriana Kreutzfeld, Josephine Grützke, Alyssa Ingmundson, Katja Müller, Kai Matuschewski

**Contents:**

- **Figures S1 - S6**
- **Tables S1-S2**

Kreutzfeld *et al.*, Figure S1

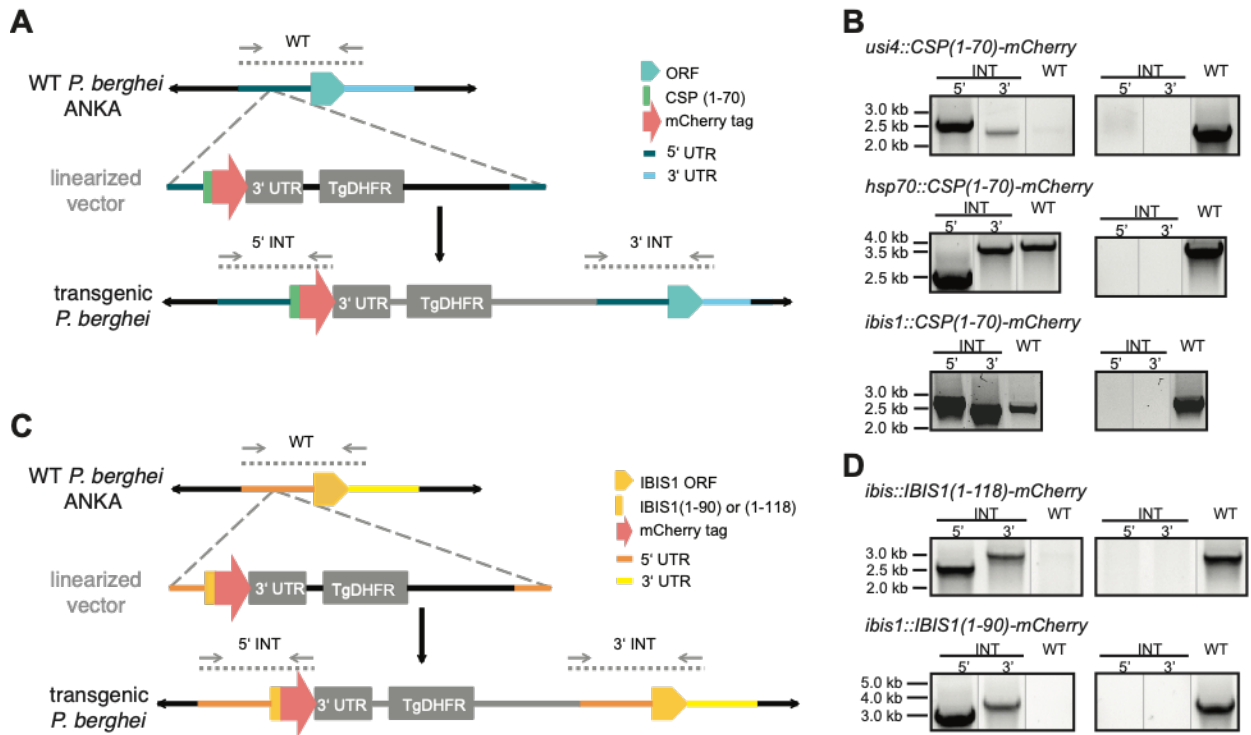

**Supplementary Figure 1. Generation of reporter parasite lines.**

Shown are the (A,C) recombination events and (B,D) diagnostic PCRs to confirm the desired integrations.

(A,C) Integration strategy for the (A) CSP<sub>1-70</sub>-mCherry and (C) IBIS<sub>1-118</sub> reporter proteins. Shown are the WT locus (top), the linearized targeting plasmid (centre) and the recombinant locus (bottom). Diagnostic primers and PCR products are shown as arrows and dotted lines.

(B,D) Diagnostic PCRs show successful integration of the targeting constructs in the recombinant parasites (left) in comparison to WT parasites (right) with the PCR products, as depicted in the schemes.



Kreutzfeld *et al.*, Figure S3

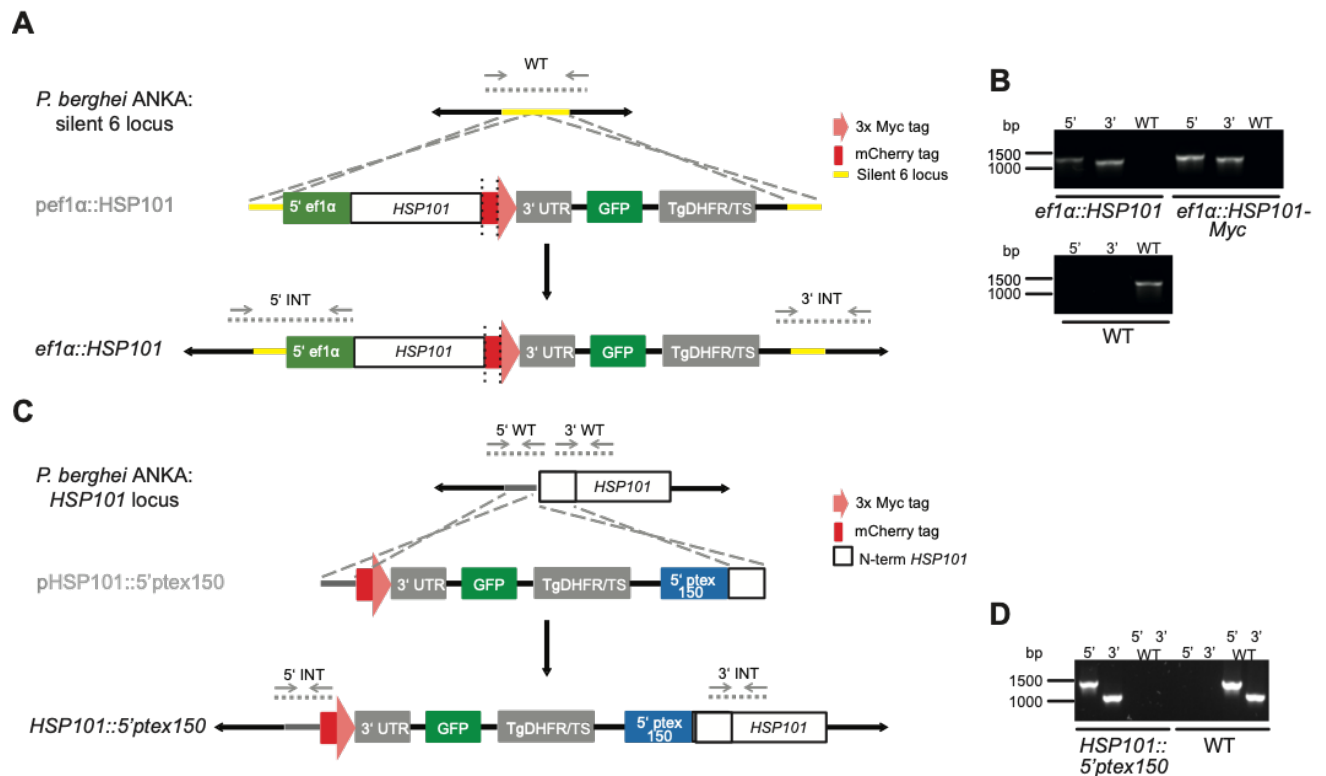

**Supplementary Figure 3. Generation of transgenic *HSP101* parasite lines.**

Shown are the (A,C) recombination events and (B,D) diagnostic PCRs to confirm the desired integrations.

(A,C) Integration strategy for the (A) *ef1α::HSP101* and (C) *HSP101::5'ptex150* parasite lines. Shown are the WT locus (top), the linearized targeting plasmid (centre) and the recombinant locus (bottom). Diagnostic primers and PCR products are shown as arrows and dotted lines.

(B,D) Diagnostic PCRs show successful integration of the targeting constructs in the recombinant parasites in comparison to WT parasites with the PCR products, as depicted in the schemes.

Kreutzfeld *et al.*, Figure S4

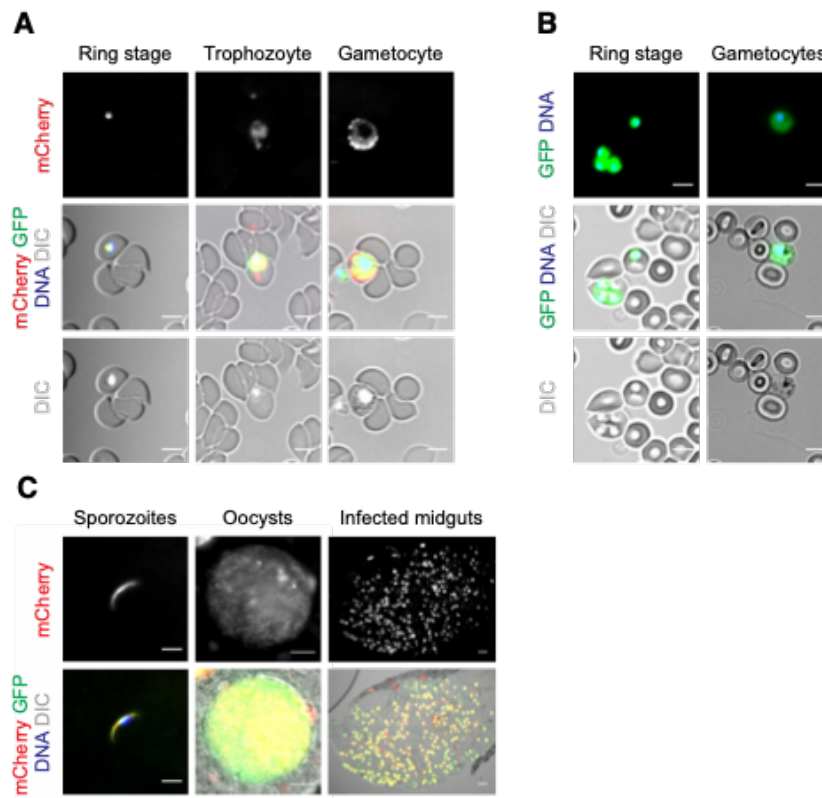

**Supplementary Figure 4. Live imaging of *eflα::HSP101* parasites.**

(A) Asexual (ring stage, trophozoite) and sexual (gametocyte) *eflα::HSP101-mCherry* blood stages from the peripheral blood. Shown are the mCherry signal (top) and merge images (bottom) of mCherry (red), GFP (green), Hoechst 33342 (blue), and DIC images. Bar, 5 μm.

(B) Asexual (ring stage) and sexual (gametocyte) *eflα::HSP101-myc* blood stages from peripheral blood. Shown are the GFP and Hoechst 33342 signal (top) and merge images (bottom), including DIC images. Bar, 5 μm.

(C) Sporozoites, oocysts and infected midguts of *eflα::HSP101-mCherry* parasites. Shown are the mCherry signal (top) and merge images (bottom) of mCherry (red), GFP (green), Hoechst 33342 (blue), and DIC images. Bar, 5 μm.

Kreutzfeld *et al.*, Figure S5

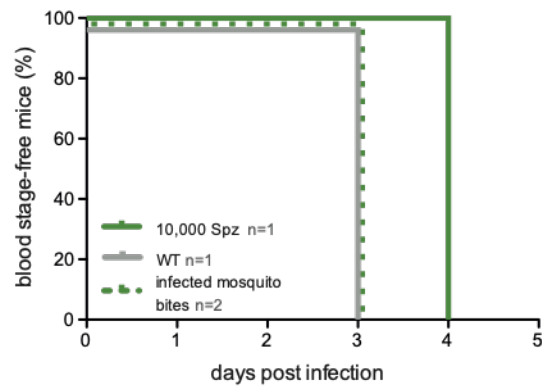

**Supplementary Figure 5. Sporozoite-induced blood infection in *ef1a::HSP101-myc* parasites.**

Shown in an exploratory Kaplan-Meier analysis of blood infection over time after intravenous injection of 10,000 sporozoites or exposure to 15 infected mosquitoes. Blood infection was monitored daily by microscopic examination of Giemsa-stained blood films.

Kreutzfeld *et al.*, Figure S6

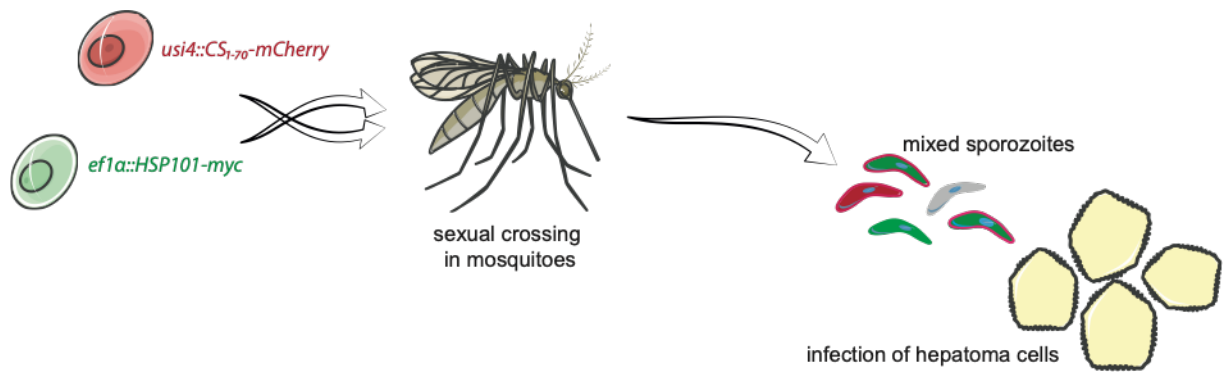

**Supplementary Figure 6. Genetic crosses by sexual recombination in *Anopheles stephensi* mosquitoes.**

Schematic representation exemplified by coinfection of *ef1a::HSP101-myc* and *UIS4::CSP<sub>1-70</sub>-mCherry* parasites. The progeny was used for hepatoma cell infections and double fluorescent parasites were imaged to monitor protein secretion during liver stage development. Illustrations modified and adapted from Smart Servier Medical Art (Servier).

**Supplementary Table 1.** Midgut oocysts and salivary gland sporozoites from *Anopheles Stephens* mosquitoes infected with WT and transgenic parasite lines

| <b>Parasite</b>                               | <b>% infectivity (d10 midgut oocysts)<sup>a</sup></b> | <b># salivary gland sporozoites per mosquito<sup>b</sup></b> |
|-----------------------------------------------|-------------------------------------------------------|--------------------------------------------------------------|
| WT                                            | 47 %                                                  | 17,500 ( $\pm$ 15,600)                                       |
| <i>ef1<math>\alpha</math>::HSP101-mCherry</i> | 50 %                                                  | 14,300 ( $\pm$ 9,900)                                        |
| <i>ef1<math>\alpha</math>::HSP101-myc</i>     | 73 %                                                  | 11,750 <sup>c</sup>                                          |
| <u><i>HSP101::5'ptex150</i></u>               | 70 %                                                  | 18,400 ( $\pm$ 4,600)                                        |

<sup>a</sup> Mean number from three independent experiments

<sup>b</sup> Mean number from six independent experiments

<sup>c</sup> Data from a single experiment only



**Supplementary Table 2.** Primer sequences for generations of plasmids, genotyping and qRT-PCR.

| <b>Name</b>              | <b>Sequence *</b>                                    |
|--------------------------|------------------------------------------------------|
| CSPfor                   | GCATCTAGAAAAGGTAAAATGAAGAAGT                         |
| CSP <sub>70</sub> rev    | CGGACTAGTCCGATCGGCAAGTA                              |
| UIS4-5'for               | TGACCGCGGCTTTATGTTTTTTGAAAGATTTAAC                   |
| UIS4-5'rev               | GATGCGGCCGCTTTATTCAGACGTAATAAT                       |
| HSP70-5'for              | TGTCCGCGGCATGATTTATTTATTTGC                          |
| HSP70-5'rev              | GATGCGGCCGCTTTTTTTAATTGTAATTG                        |
| IBIS1-5'for              | GCATCCGCGGCGTATTTAATCATACTATACGTTTTTCC               |
| IBIS1-5'rev              | CGGGCGGCCGCTTTTTAACTAATATGTTTTC                      |
| IBIS1 <sub>90</sub> rev  | GGACTAGTATCCAACCTCTGATAATATTCTGCTTTTTCC              |
| IBIS1 <sub>118</sub> rev | GGACTAGTTGACATATATGAGGTTGATGCATTTTCAG                |
| 5' int B3D rev           | GATCCTTACTTGTACAGC                                   |
| 3' int B3D fwd           | CTAATACGACTCACTATAGGGC                               |
| HSP70 5'int fwd          | CCATAATGTTTCGATCGAGCAAATAACTTT                       |
| HSP70 3'int rev          | CGACTCCATTCACCTTATTCCTTTTTTCAT                       |
| UIS4 5'int fwd           | CAAATAATTGTGTATGTAATATTTAAGTGTAGAATGGAAT             |
| UIS4 3'int rev           | CTCTATAACATTATTTTTCTTTTTCTTACTT                      |
| IBIS1 5'int fwd          | AAAATAATACATTTAATGAAGGGGAAAAGG                       |
| IBIS1 3'int rev          | CATTAAAATATAACAATTTTCGATATAATATGTTGATC               |
| HSP101for                | CATCTAGAATGGTACGGAACATTGCTAAAAATTATTTATTTG           |
| HSP101rev                | GCCCTTGCTCACACCGGTTGACAATGAAAGGTTAATAACAATGTTG       |
| 5'EF1a fwd               | CATGAGCGCGCGATTTACATGGCGTTTTATGTTTATATG              |
| 5'EF1a rev               | GCTCATCTAGATTTTATAAAATTTTTATTTATTTATAAGCAAATATA      |
| linker fwd               | CGAGTGGCCACGTGGCCACCAGAACCACCACCGGTTTCATG            |
| linker rev               | CATGAACCGGTGGTGGTTCTGGTGGCCACGTGGCCACTCG             |
| HSP101-5'-F              | AGTACCCCGCGGATAAATAGAATAAGATGCTTGCTTTTCG             |
| HSP101-5'-R              | ATCAGGGTTAACTAAATTTATAGTAAATATAGATATAATTTTATCTTCATTC |
| HSP101_amino_F           | CCCGGGGTTTAAACATGGTACGGAACATTGCTAAAAAT               |
| HSP101_amino_R           | CCAAAGTTTTAGCTATTACCGC                               |
| PTEX150-5'-<br>PrimerF   | TTGTCTCCGCGGTATATAAAGTGTTAATAGTGTTTTTTTTTGTGC        |

Supplementary Material Kreutzfeld *et al.*

|                                         |                                                             |
|-----------------------------------------|-------------------------------------------------------------|
| PTEX150-5'-<br>PrimerR                  | CTTGCC <u>GTTAACT</u> TTTATTATTCTAATTTATTATATTTTCGTTTCTTTTG |
| WT fwd                                  | GACAGCGCATATGATGGATG                                        |
| WT rev                                  | TTTGAGAAATTGCGTATTCGTA                                      |
| 5' integration fwd<br>efla::hsp101      | ATGAAATACCGCTCCATTTTTCC                                     |
| 3' integration rev<br>efla::hsp101      | CATCTAGATTTTATAAAAATTTTATTATTATAAGCAAATATA                  |
| 3' integration fwd<br>hsp101::5'ptex150 | GACTGAGGTTGTGTGATGGC                                        |
| 3' integration rev<br>hsp101::5'ptex150 | GAGCCAAATTGTTCAATGTTTAAT                                    |
| 5' integration fwd<br>hsp101::5'ptex150 | CTATAAATTTAGTAGAAATGGTACGGAAC                               |
| 5' integration rev<br>hsp101::5'ptex150 | GACACTTATATATTTATACTAAGTTTCG                                |
| HSP70 fwd qPCR                          | GCTAACGCAAAAGCAAAGC                                         |
| HSP70 rev qPCR                          | TCGGTAAAAGCTACATAGGATG                                      |
| HSP101 fwd qPCR                         | TTTGTTATTGTCTGTGCTCAAGG                                     |
| HSP101 rev qPCR                         | GCAAAGGTTTAAATTGGTTATGACC                                   |
| Pb18 fwd                                | AAGCATTAATAAAGCGAATACATCCTTAC                               |
| Pb18 rev                                | GGAGATTGGTTTTGACGTTTATGTG                                   |
| mGAPDH fwd                              | CGTCCCGTAGACAAAATGGT                                        |
| mGAPDH rev                              | TTGATGGCAACAATCTCCAC                                        |

---

\* Restriction sites are underlined
